# Supplementary material for: Ventilator-Associated Pneumonia in COVID-19 Patients Admitted in Intensive Care Units: Relapse, Therapeutic Failure and Attributable Mortality—A Multicentric Observational Study from the OutcomeRea Network
Source: MDPI journal article supplement (doi:10.3390/jcm12041298), 2023-02-06
Supplement: s1 [file s1]

**Supplement Figure S1.** Flow diagram

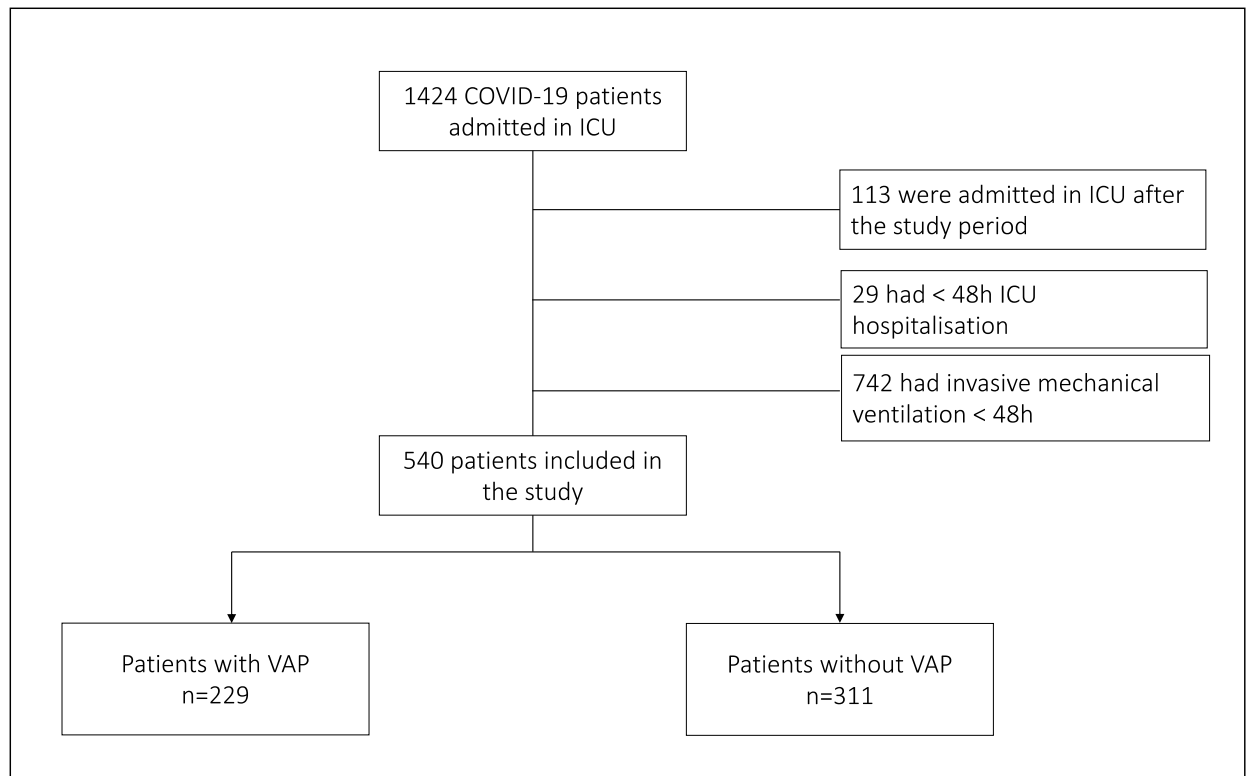

**Supplement Table S1.** Characteristics of pulmonary infections according to the timing and evolution under treatment (expressed by number of episodes of infections: 354 episodes of VAP occurred in 201 patients).

|                                     | VAP        | Early VAP* | Late VAP*  | p-value | 1st VAP    | Superinfection <sup>†</sup> | p-value | 1st VAP    | Relapse <sup>‡</sup> | p-value |
|-------------------------------------|------------|------------|------------|---------|------------|-----------------------------|---------|------------|----------------------|---------|
|                                     | n=383      | n=95       | n=288      |         | n=236      | n=73                        |         | n=230      | n=105                |         |
| Number of episodes                  |            |            |            |         |            |                             |         |            |                      |         |
| Gram positive bacteria              | 124 (32.4) | 37 (38.9)  | 87 (30.2)  | 0.11    | 81 (34.3)  | 24 (32.9)                   | 0.82    | 78 (33.9)  | 31 (29.5)            | 0.43    |
| <i>Streptococcus pneumoniae</i>     | 7 (1.8)    | 3 (3.2)    | 4 (1.4)    | 0.26    | 7 (3)      | 0 (0)                       | 0.14    | 6 (2.6)    | 1 (1)                | 0.33    |
| Other <i>Streptococci</i>           | 12 (3.2)   | 3 (3.2)    | 9 (3.1)    | 0.99    | 10 (4.2)   | 2 (2.7)                     | 0.56    | 10 (4.3)   | 0 (0)                | 0.03    |
| <i>Staphylococcus aureus</i>        | 84 (22)    | 25 (26.3)  | 59 (20.5)  | 0.23    | 50 (21.2)  | 20 (27.4)                   | 0.27    | 49 (21.3)  | 24 (22.9)            | 0.75    |
| <i>Moraxella catarrhalis</i>        | 1 (0.2)    | 0 (0)      | 1 (0.3)    | 0.57    | 1 (0.4)    | 0 (0)                       | 0.58    | 1 (0.4)    | 0 (0)                | 0.50    |
| Gram negative bacteria              | 316 (82.6) | 72 (75.8)  | 244 (84.7) | 0.05    | 185 (78.4) | 60 (82.2)                   | 0.48    | 180 (78.3) | 92 (87.6)            | 0.04    |
| <i>Haemophilus influenza</i>        | 16 (4.2)   | 10 (10.5)  | 6 (2.1)    | < 0.01  | 16 (6.8)   | 0 (0)                       | 0.02    | 16 (7)     | 0 (0)                | < 0.01  |
| Enterobacteriales                   | 191 (49.8) | 37 (38.9)  | 154 (53.5) | 0.01    | 121 (51.3) | 33 (45.2)                   | 0.37    | 118 (51.3) | 50 (47.6)            | 0.53    |
| Group 1 or 2 enterobacteriales      | 103 (26.8) | 21 (22.1)  | 82 (28.5)  | 0.22    | 68 (28.8)  | 21 (28.8)                   | 0.99    | 67 (29.1)  | 21 (20)              | 0.08    |
| <i>Proteus sp</i>                   | 15 (4)     | 0 (0)      | 15 (5.2)   | 0.02    | 8 (3.4)    | 6 (8.2)                     | 0.08    | 8 (3.5)    | 2 (1.9)              | 0.43    |
| <i>Escherichia coli</i>             | 49 (12.8)  | 8 (8.4)    | 41 (14.2)  | 0.14    | 30 (12.7)  | 12 (16.4)                   | 0.42    | 29 (12.6)  | 11 (10.5)            | 0.58    |
| <i>Klebsiella pneumoniae</i>        | 42 (11)    | 12 (12.6)  | 30 (10.4)  | 0.55    | 30 (12.7)  | 6 (8.2)                     | 0.30    | 30 (13)    | 9 (8.6)              | 0.24    |
| <i>Citrobacter koserii</i>          | 6 (1.6)    | 2 (2.1)    | 4 (1.4)    | 0.63    | 5 (2.1)    | 1 (1.4)                     | 0.69    | 5 (2.2)    | 1 (1)                | 0.43    |
| Group 3 enterobacteriales           | 88 (23)    | 11 (11.6)  | 55 (19.1)  | 0.09    | 38 (16.1)  | 10 (13.7)                   | 0.62    | 36 (15.7)  | 25 (23.8)            | 0.07    |
| <i>Enterobacter sp</i>              | 66 (17.2)  | 18 (18.9)  | 70 (24.3)  | 0.28    | 52 (22)    | 15 (20.5)                   | 0.79    | 50 (21.7)  | 32 (30.5)            | 0.08    |
| <i>Serratia marcescens</i>          | 16 (4.2)   | 5 (5.3)    | 11 (3.8)   | 0.54    | 11 (4.7)   | 4 (5.5)                     | 0.78    | 11 (4.8)   | 4 (3.8)              | 0.69    |
| <i>Citrobacter freundii</i>         | 3 (0.8)    | 1 (1.1)    | 2 (0.7)    | 0.73    | 1 (0.4)    | 0 (0)                       | 0.58    | 1 (0.4)    | 2 (1.9)              | 0.19    |
| <i>Morganella morganii</i>          | 5 (1.4)    | 1 (1.1)    | 4 (1.4)    | 0.80    | 4 (1.7)    | 1 (1.4)                     | 0.85    | 4 (1.7)    | 1 (1)                | 0.58    |
| Non-fermenting GNB                  | 133 (34.8) | 28 (29.5)  | 105 (36.5) | 0.21    | 57 (24.2)  | 33 (45.2)                   | < 0.01  | 55 (23.9)  | 54 (51.4)            | < 0.01  |
| <i>Pseudomonas aeruginosa</i>       | 95 (24.8)  | 18 (18.9)  | 77 (26.7)  | 0.13    | 42 (17.8)  | 25 (34.2)                   | < 0.01  | 41 (17.8)  | 37 (35.2)            | < 0.01  |
| <i>Stenotrophomonas maltophilia</i> | 17 (4.4)   | 5 (5.3)    | 12 (4.2)   | 0.65    | 9 (3.8)    | 1 (1.4)                     | 0.30    | 9 (3.9)    | 7 (6.7)              | 0.27    |

|                                                                                            |            |           |            |        |            |           |        |            |            |        |
|--------------------------------------------------------------------------------------------|------------|-----------|------------|--------|------------|-----------|--------|------------|------------|--------|
| <i>Acinetobacter baumannii</i>                                                             | 24 (6.2)   | 5 (5.3)   | 19 (6.6)   | 0.64   | 6 (2.5)    | 11 (15.1) | < 0.01 | 5 (2.2)    | 12 (11.4)  | < 0.01 |
| MDR or XDR                                                                                 | 114 (29.8) | 18 (18.9) | 96 (33.3)  | < 0.01 | 64 (27.1)  | 23 (31.5) | 0.47   | 62 (27)    | 38 (36.2)  | 0.09   |
| ESBL-producing bacteria                                                                    | 52 (13.6)  | 12 (12.6) | 40 (13.9)  | 0.76   | 33 (14)    | 9 (12.3)  | 0.72   | 32 (13.9)  | 14 (13.3)  | 0.89   |
| Carbapenemase-producing bacteria                                                           | 7 (1.8)    | 0 (0)     | 7 (2.4)    | 0.13   | 5 (2.1)    | 0 (0)     | 0.21   | 5 (2.2)    | 2 (1.9)    | 0.87   |
| AmpC-hyperproduction                                                                       | 7 (1.8)    | 3 (3.2)   | 4 (1.4)    | 0.26   | 7 (3)      | 0 (0)     | 0.14   | 7 (3)      | 0 (0)      | 0.07   |
| Resistant <i>Pseudomonas aeruginosa</i> §                                                  | 36 (9.4)   | 4 (4.2)   | 32 (11.1)  | 0.05   | 12 (5.1)   | 8 (11)    | 0.07   | 12 (5.2)   | 21 (20)    | < 0.01 |
| Carbapenem Resistant <i>Acinetobacter baumannii</i>                                        | 11 (2.8)   | 2 (2.1)   | 9 (3.1)    | 0.61   | 2 (0.8)    | 7 (9.6)   | < 0.01 | 2 (0.9)    | 4 (3.8)    | 0.06   |
| MRSA                                                                                       | 13 (3.4)   | 0 (0)     | 13 (4.5)   | 0.04   | 5 (2.1)    | 7 (9.6)   | < 0.01 | 5 (2.2)    | 7 (6.7)    | 0.04   |
| Susceptible species ( <i>Streptococcus sp</i> ,<br><i>Moraxella</i> , <i>Haemophilus</i> ) | 34 (8.8)   | 14 (14.7) | 20 (6.9)   | 0.02   | 32 (13.6)  | 2 (2.7)   | < 0.01 | 31 (13.5)  | 1 (1)      | < 0.01 |
| More than one strain                                                                       | 95 (24.8)  | 17 (17.9) | 78 (27.1)  | 0.07   | 45 (19.1)  | 31 (42.5) | < 0.01 | 43 (18.7)  | 35 (33.3)  | < 0.01 |
| Time to adequate Antimicrobial therapy                                                     | 1 [1 - 2]  | 1 [1 - 2] | 1 [1 - 3]  | 0.70   | 1 [1 - 2]  | 2 [1 - 3] | 0.27   | 1 [1 - 2]  | 1 [-3 - 2] | 0.04   |
| Adequacy                                                                                   | 164 (42.8) | 44 (46.3) | 120 (41.7) | .      | 105 (44.7) | 34 (48.6) | .      | 104 (45.4) | 37 (35.9)  | .      |
| Bi antimicrobial therapy                                                                   | 159 (41.6) | 44 (46.3) | 115 (39.9) | 0.27   | 92 (39)    | 30 (41.1) | 0.75   | 88 (38.3)  | 49 (46.7)  | 0.15   |
| Aminoside                                                                                  | 72 (18.8)  | 18 (18.9) | 54 (18.8)  | 0.97   | 46 (19.5)  | 17 (23.3) | 0.48   | 45 (19.6)  | 14 (13.3)  | 0.16   |
| Fluoroquinolone                                                                            | 53 (13.8)  | 14 (14.7) | 39 (13.5)  | 0.77   | 25 (10.6)  | 8 (11)    | 0.93   | 24 (10.4)  | 24 (22.9)  | < 0.01 |

\*Early-onset VAP was defined as VAP occurring within the first 7 days after invasive ventilation, and late-onset VAP as VAP occurring on or after the 7<sup>th</sup> day after invasive ventilation.

§ Resistance to ticarcillin, ceftazidime or carbapenem

† different pathogen than previously isolated

‡ same pathogens as previously isolated

VAP: Ventilator-Associated Pneumonia; GNB: Gram Negative Bacteria; MDR: Multi-drug resistant; XDR: Extended-drug resistant; ESBL: Extended-spectrum  $\beta$ -lactamase; MRSA: Methicillin-resistant *Staphylococcus aureus*.

**Supplement Table S2. Risks factors associated with day-60 mortality (univariate analysis).**

|                                                    | Alive<br>n=287  | Dead<br>n=253 | <i>p</i> -value | Hazard Ratio | HR 95% CI     | <i>p</i> -value |
|----------------------------------------------------|-----------------|---------------|-----------------|--------------|---------------|-----------------|
| Period (before May 2020)                           | 165 (57.5)      | 119 (47)      | 0.02            | 0.89         | [0.67 - 1.18] | 0.41            |
| Age                                                |                 |               |                 |              |               |                 |
| < 50                                               | 58 (20.2)       | 16 (6.3)      | -               | -            | -             | -               |
| 50 - 60                                            | 64 (22.3)       | 109 (43.1)    | -               | 3.86         | [2.26 - 6.61] | < 0.01          |
| 60 - 70                                            | 77 (26.8)       | 85 (33.6)     | -               | 2.98         | [1.74 - 5.12] | < 0.01          |
| >70                                                | 88 (30.7)       | 43 (17)       | < 0.01          | 1.48         | [0.83 - 2.66] | 0.18            |
| Male gender                                        | 211 (73.5)      | 190 (75.1)    | 0.68            | 0.98         | [0.73 - 1.32] | 0.91            |
| Body-mass index $\geq 30$ kg/m <sup>2</sup>        | 120 (41.8)      | 103 (40.7)    | 0.80            | 0.94         | [0.72 - 1.21] | 0.62            |
| Comorbidities                                      | 165 (57.5)      | 192 (75.9)    | < 0.01          | 1.70         | [1.26 - 2.29] | < 0.01          |
| Immunosuppression                                  | 16 (5.6)        | 42 (16.6)     | < 0.01          | 1.61         | [1.13 - 2.28] | 0.01            |
| ICU admission characteristics                      |                 |               |                 |              |               |                 |
| Time between symptoms and ICU admission > 10 days  | 110 (38.3)      | 74 (29.2)     | 0.03            | 0.74         | [0.56 - 0.98] | 0.04            |
| Time between ICU admission and intubation > 5 days | 16 (5.6)        | 51 (20.2)     | < 0.01          | 2.08         | [1.47 - 2.96] | < 0.01          |
| MDR colonization                                   | 13 (4.5)        | 19 (7.5)      | 0.14            | 1.15         | [0.7 - 1.9]   | 0.58            |
| Corticosteroid                                     | 126 (43.9)      | 151 (59.7)    | < 0.01          | 1.42         | [1.08 - 1.87] | 0.01            |
| Immunomodulator                                    | 41 (14.3)       | 43 (17)       | 0.39            | 1.04         | [0.73 - 1.47] | 0.84            |
| Antibiotic therapy                                 | 216 (75.3)      | 171 (67.6)    | 0.05            | 0.70         | [0.53 - 0.92] | 0.01            |
| Broad spectrum antibiotics                         | 26 (9.1)        | 44 (17.4)     | < 0.01          | 1.44         | [1.03 - 2.01] | 0.03            |
| Carbapenems                                        | 9 (3.1)         | 7 (2.8)       | 0.80            | 0.92         | [0.38 - 2.25] | 0.86            |
| During the first 2 days of intubation              |                 |               |                 |              |               |                 |
| PEEP > 12 cmH <sub>2</sub> O                       | 77 (26.8)       | 89 (35.2)     | 0.04            | 1.17         | [0.89 - 1.53] | 0.25            |
| Prone position                                     | 98 (34.1)       | 77 (30.4)     | 0.36            | 0.90         | [0.67 - 1.2]  | 0.48            |
| Neuromuscular blockade                             | 227 (79.1)      | 209 (82.6)    | 0.30            | 1.09         | [0.77 - 1.55] | 0.61            |
| ECMO                                               | 21 (7.3)        | 26 (10.3)     | 0.22            | 0.98         | [0.64 - 1.51] | 0.94            |
| Renal replacement therapy                          | 16 (5.6)        | 40 (15.8)     | < 0.01          | 1.60         | [1.11 - 2.32] | 0.01            |
| Vasopressor                                        | 161 (56.1)      | 145 (57.3)    | 0.78            | 1.08         | [0.78 - 1.5]  | 0.64            |
| Enteral nutrition                                  | 187 (65.2)      | 145 (57.3)    | 0.06            | 0.65         | [0.48 - 0.88] | 0.01            |
| Parenteral nutrition                               | 36 (12.5)       | 70 (27.7)     | < 0.01          | 1.88         | [1.33 - 2.65] | < 0.01          |
| Lymphocytes/neutrophils ratio>0.1                  | 0.1 [0.1 - 0.1] | 0.1 [0 - 0.1] | < 0.01          | 0.57         | [0.41 - 0.79] | <.01            |
| Before period at risk of VAP                       |                 |               |                 |              |               |                 |
| Antibiotic therapy                                 | 254 (88.5)      | 216 (85.4)    | 0.28            | 0.76         | [0.53 - 1.09] | 0.14            |
| Broad spectrum antibiotic therapy                  | 87 (30.3)       | 87 (34.4)     | 0.31            | 1.02         | [0.78 - 1.34] | 0.86            |
| Carbapenems                                        | 29 (10.1)       | 19 (7.5)      | 0.29            | 0.63         | [0.38 - 1.05] | 0.08            |

|                             |            |            |      |      |               |      |
|-----------------------------|------------|------------|------|------|---------------|------|
| Type of VAP                 |            |            |      |      |               |      |
| VAP                         | 120 (41.8) | 109 (43.1) | 0.77 | 1.25 | [0.94 - 1.65] | 0.12 |
| Early VAP                   | 45 (15.7)  | 48 (19)    | 0.31 | 1.03 | [0.74 - 1.43] | 0.88 |
| Late VAP                    | 99 (34.5)  | 80 (31.6)  | 0.48 | 1.36 | [0.99 - 1.85] | 0.06 |
| Superinfection <sup>†</sup> | 36 (12.5)  | 22 (8.7)   | 0.15 | 1.24 | [0.73 - 2.1]  | 0.42 |
| Relapse <sup>‡</sup>        | 38 (13.2)  | 24 (9.5)   | 0.17 | 1.20 | [0.74 - 1.94] | 0.45 |

<sup>†</sup> different pathogen than previously isolated

<sup>‡</sup> same pathogens as previously isolated

ICU: Intensive care unit; MDR: Multi-drug Resistant; PEEP: Positive-End-Expiratory pressure; ECMO: Extracorporeal Membrane Oxygenation; VAP: Ventilator-Associated Pneumonia; ATB: Antibiotic

**Supplement Table S3.** Risk factors associated with superinfection (univariate analysis).

|                                                       | No Superinfection<br>n=172 | Superinfection<br>n=57 | Hazard Ratio | HR95% IC      | p-value |
|-------------------------------------------------------|----------------------------|------------------------|--------------|---------------|---------|
| Period (before May 2020)                              | 104 (60.5)                 | 18 (31.6)              | 0.41         | [0.23 - 0.72] | <0.01   |
| Age > 70                                              | 55 (32)                    | 13 (22.8)              | 0.71         | [0.36 - 1.38] | 0.31    |
| Male gender                                           | 135 (78.5)                 | 43 (75.4)              | 0.86         | [0.48 - 1.53] | 0.61    |
| Body-mass index $\geq 30$ kg/m <sup>2</sup>           | 72 (41.9)                  | 34 (59.6)              | 1.69         | [1 - 2.86]    | 0.05    |
| Immunosuppression                                     | 10 (5.8)                   | 4 (7)                  | 1.09         | [0.4 - 2.95]  | 0.87    |
| Time between ICU admission and<br>intubation > 5 days | 15 (8.7)                   | 8 (14)                 | 1.14         | [0.5 - 2.62]  | 0.76    |
| Characteristics before the day of VAP                 |                            |                        |              |               |         |
| Tocilizumab                                           | 8 (4.7)                    | 4 (7)                  | 1.72         | [0.61 - 4.82] | 0.30    |
| Carbapenems                                           | 13 (7.6)                   | 5 (8.8)                | 1.16         | [0.45 - 2.99] | 0.76    |
| MDR colonization                                      | 18 (10.5)                  | 7 (12.3)               | 1.19         | [0.53 - 2.67] | 0.67    |
| Steroids                                              | 99 (57.6)                  | 32 (56.1)              | 1.00         | [0.6 - 1.68]  | 0.99    |
| ECMO                                                  | 20 (11.6)                  | 17 (29.8)              | 2.30         | [1.23 - 4.32] | 0.01    |
| PEEP > 12 cmH <sub>2</sub> O                          | 43 (25)                    | 18 (31.6)              | 1.25         | [0.7 - 2.25]  | 0.45    |
| Prone position                                        | 50 (29.1)                  | 17 (29.8)              | 1.00         | [0.56 - 1.79] | 1.00    |
| Renal replacement therapy                             | 38 (22.1)                  | 11 (19.3)              | 0.80         | [0.4 - 1.62]  | 0.54    |
| Vasopressor                                           | 68 (39.5)                  | 25 (43.9)              | 1.64         | [0.86 - 3.15] | 0.14    |
| Enteral nutrition                                     | 133 (77.3)                 | 45 (78.9)              | 0.92         | [0.44 - 1.92] | 0.83    |
| Parenteral nutrition                                  | 53 (30.8)                  | 18 (31.6)              | 1.39         | [0.74 - 2.61] | 0.31    |
| Proto pump inhibitor                                  | 127 (73.8)                 | 41 (71.9)              | 0.91         | [0.49 - 1.71] | 0.78    |
| Lymphocytes/neutrophils ratio > 1                     | 124 (72.1)                 | 44 (77.2)              | 1.10         | [0.57 - 2.11] | 0.78    |
| Highly susceptible germs                              | 20 (11.6)                  | 12 (21.1)              | 2.15         | [1.18 - 3.93] | 0.01    |
| <i>Staphylococcus aureus</i> species                  | 31 (18)                    | 18 (31.6)              | 1.59         | [0.91 - 2.78] | 0.10    |
| Group 1-2 <i>enterobacterales</i>                     | 53 (30.8)                  | 11 (19.3)              | 0.56         | [0.28 - 1.12] | 0.10    |
| Group 3 <i>enterobacterales</i>                       | 42 (24.4)                  | 10 (17.5)              | 0.79         | [0.39 - 1.58] | 0.50    |
| Non fermentant species                                | 48 (27.9)                  | 7 (12.3)               | 0.39         | [0.18 - 0.84] | 0.02    |
| MDR or XDR                                            | 54 (31.4)                  | 7 (12.3)               | 0.36         | [0.16 - 0.8]  | 0.01    |
| Bi antimicrobial therapy                              | 73 (42.4)                  | 15 (26.3)              | 0.51         | [0.28 - 0.92] | 0.03    |
| Broad spectrum antimicrobial therapy                  | 110 (64)                   | 28 (49.1)              | 0.59         | [0.35 - 1]    | 0.05    |
| Adequation                                            | 81 (47.1)                  | 29 (50.9)              | 1.21         | [0.72 - 2.04] | 0.47    |

ICU: Intensive care unit; VAP: Ventilator-Associated Pneumonia; ECMO: Extracorporeal Membrane Oxygenation; PEEP: Positive-End-Expiratory pressure; Non-fermenting species: *Pseudomonas aeruginosa*, *Acinetobacter baumannii*, *Stenotrophomonas maltophilia*; MDR: Multi-drug Resistant; XDR: Extended-drug resistant.

**Supplement Table S4.** Risk factors associated with relapse (univariate analysis).

|                                                       | No Relapse<br>n=168 | Relapse<br>n=61 | Hazard Ratio | HR 95% IC     | p-value |
|-------------------------------------------------------|---------------------|-----------------|--------------|---------------|---------|
| Period (before May 2020)                              | 98 (58.3)           | 24 (39.3)       | 0.61         | [0.36 - 1.03] | 0.07    |
| Age >70                                               | 46 (27.4)           | 16 (26.2)       | 0.70         | [0.31 - 1.57] | 0.39    |
| Male gender                                           | 126 (75)            | 52 (85.2)       | 1.87         | [0.94 - 3.75] | 0.08    |
| Body-mass index $\geq 30$ kg/m <sup>2</sup>           | 77 (45.8)           | 29 (47.5)       | 1.00         | [0.6 - 1.64]  | 0.99    |
| Immunosuppression                                     | 12 (7.1)            | 2 (3.3)         | 0.39         | [0.11 - 1.35] | 0.14    |
| Time between ICU admission and<br>intubation > 5 days | 15 (8.9)            | 8 (13.1)        | 1.13         | [0.52 - 2.46] | 0.75    |
| Characteristics before the day of VAP                 |                     |                 |              |               |         |
| Tocilizumab                                           | 9 (5.4)             | 3 (4.9)         | 1.27         | [0.37 - 4.3]  | 0.70    |
| Carbapenems                                           | 10 (6)              | 8 (13.1)        | 1.77         | [0.85 - 3.68] | 0.12    |
| MDR colonization                                      | 16 (9.5)            | 9 (14.8)        | 1.27         | [0.63 - 2.56] | 0.50    |
| Steroids                                              | 94 (56)             | 37 (60.7)       | 1.19         | [0.72 - 1.99] | 0.49    |
| ECMO                                                  | 19 (11.3)           | 18 (29.5)       | 1.69         | [0.98 - 2.9]  | 0.06    |
| PEEP > 12 cmH <sub>2</sub> O                          | 44 (26.2)           | 17 (27.9)       | 0.99         | [0.54 - 1.83] | 0.99    |
| Prone position                                        | 45 (26.8)           | 22 (36.1)       | 1.27         | [0.73 - 2.21] | 0.39    |
| Renal replacement therapy                             | 38 (22.6)           | 11 (18)         | 0.65         | [0.34 - 1.26] | 0.20    |
| Vasopressor                                           | 66 (39.3)           | 27 (44.3)       | 2.00         | [1.14 - 3.51] | 0.02    |
| Enteral nutrition                                     | 125 (74.4)          | 53 (86.9)       | 1.15         | [0.48 - 2.76] | 0.76    |
| Parenteral nutrition                                  | 58 (34.5)           | 13 (21.3)       | 1.24         | [0.58 - 2.66] | 0.58    |
| Proto pump inhibitor                                  | 121 (72)            | 47 (77)         | 1.21         | [0.64 - 2.28] | 0.56    |
| Lymphocytes/neutrophils ratio > 1                     | 122 (72.6)          | 46 (75.4)       | 1.27         | [0.71 - 2.27] | 0.42    |
| Highly susceptible germs                              | 25 (14.9)           | 0 (0)           |              |               |         |
| <i>Staphylococcus aureus</i> species                  | 36 (21.4)           | 8 (13.1)        | 0.57         | [0.28 - 1.16] | 0.12    |
| Group 1-2 <i>enterobacteriaceae</i>                   | 45 (26.8)           | 16 (26.2)       | 1.02         | [0.57 - 1.84] | 0.94    |
| Group 3 <i>enterobacteriaceae</i>                     | 37 (22)             | 18 (29.5)       | 1.47         | [0.84 - 2.56] | 0.17    |
| Non fermentant species                                | 38 (22.6)           | 23 (37.7)       | 1.54         | [0.94 - 2.53] | 0.08    |
| MDR or XDR                                            | 45 (26.8)           | 16 (26.2)       | 1.06         | [0.59 - 1.92] | 0.83    |
| Bi antimicrobial therapy                              | 64 (38.1)           | 24 (39.3)       | 1.04         | [0.62 - 1.74] | 0.88    |
| Broad spectrum antimicrobial therapy                  | 97 (57.7)           | 41 (67.2)       | 1.48         | [0.87 - 2.54] | 0.15    |
| Adequation                                            | 80 (47.6)           | 30 (49.2)       | 1.13         | [0.69 - 1.86] | 0.62    |

ICU: Intensive care unit; VAP: Ventilator-Associated Pneumonia; ECMO: Extracorporeal Membrane Oxygenation; PEEP: Positive-End-Expiratory pressure; Non-fermenting species: *Pseudomonas aeruginosa*, *Acinetobacter baumannii*, *Stenotrophomonas maltophilia*; MDR: Multi-drug Resistant; XDR: Extended-drug resistant.

**Supplement Table S5. Risk factors associated with treatment failure (univariate analysis).**

|                                                    | No Failure<br>n=72 | Failure<br>n=157 | Hazard Ratio | HR 95% IC     | p-value |
|----------------------------------------------------|--------------------|------------------|--------------|---------------|---------|
| Period of admission (before May 2020)              | 47 (65.3)          | 75 (47.8)        | 0.97         | [0.69 - 1.36] | 0.85    |
| Age > 70 y                                         | 13 (18.1)          | 55 (35)          | 1.90         | [1.33 - 2.72] | <0.01   |
| Male gender                                        | 55 (76.4)          | 123 (78.3)       | 0.90         | [0.6 - 1.33]  | 0.58    |
| Body-mass index $\geq 30$ kg/m <sup>2</sup>        | 31 (43.1)          | 75 (47.8)        | 1.10         | [0.8 - 1.51]  | 0.55    |
| Immunosuppression                                  | 3 (4.2)            | 11 (7)           | 0.77         | [0.41 - 1.44] | 0.42    |
| Time between ICU admission and intubation > 5 days | 1 (1.4)            | 22 (14)          | 1.30         | [0.8 - 2.09]  | 0.28    |
| Characteristics before the day of VAP              |                    |                  |              |               |         |
| Tocilizumab                                        | 4 (5.6)            | 8 (5.1)          | 1.30         | [0.62 - 2.73] | 0.48    |
| Carbapenems                                        | 7 (9.7)            | 11 (7)           | 0.63         | [0.34 - 1.18] | 0.15    |
| MDR colonization                                   | 8 (11.1)           | 17 (10.8)        | 1.09         | [0.66 - 1.83] | 0.73    |
| Steroids                                           | 38 (52.8)          | 93 (59.2)        | 1.46         | [1.05 - 2.03] | 0.02    |
| ECMO                                               | 2 (2.8)            | 35 (22.3)        | 0.99         | [0.66 - 1.5]  | 0.98    |
| PEEP > 12 cmH <sub>2</sub> O                       | 9 (12.5)           | 52 (33.1)        | 1.36         | [0.94 - 1.96] | 0.11    |
| Prone position                                     | 16 (22.2)          | 51 (32.5)        | 1.22         | [0.86 - 1.74] | 0.26    |
| Renal replacement therapy                          | 6 (8.3)            | 43 (27.4)        | 1.42         | [0.99 - 2.03] | 0.06    |
| Vasopressor                                        | 21 (29.2)          | 72 (45.9)        | 1.24         | [0.85 - 1.82] | 0.27    |
| Enteral nutrition                                  | 60 (83.3)          | 118 (75.2)       | 0.82         | [0.52 - 1.3]  | 0.40    |
| Parenteral nutrition                               | 19 (26.4)          | 52 (33.1)        | 1.53         | [0.98 - 2.39] | 0.06    |
| Proto pump inhibitor                               | 51 (70.8)          | 117 (74.5)       | 1.27         | [0.85 - 1.88] | 0.24    |
| Lymphocytes/neutrophils ratio > 1                  | 51 (70.8)          | 117 (74.5)       | 0.93         | [0.63 - 1.37] | 0.70    |
| Highly susceptible germs                           | 10 (13.9)          | 22 (14)          | 1.07         | [0.68 - 1.7]  | 0.77    |
| <i>Staphylococcus aureus</i> species               | 16 (22.2)          | 33 (21)          | 0.98         | [0.66 - 1.46] | 0.93    |
| Group 1 or 2 <i>enterobacteriaceae</i>             | 24 (33.3)          | 40 (25.5)        | 0.99         | [0.68 - 1.45] | 0.95    |
| Group 3 <i>enterobacteriaceae</i>                  | 21 (29.2)          | 31 (19.7)        | 0.85         | [0.57 - 1.27] | 0.44    |
| Non fermentant species                             | 17 (23.6)          | 38 (24.2)        | 1.21         | [0.83 - 1.77] | 0.32    |
| MDR or XDR                                         | 19 (26.4)          | 42 (26.8)        | 1.08         | [0.75 - 1.56] | 0.67    |
| Bi antimicrobial therapy                           | 23 (31.9)          | 65 (41.4)        | 1.07         | [0.78 - 1.49] | 0.67    |
| Broad spectrum antimicrobial therapy               | 50 (69.4)          | 88 (56.1)        | 0.77         | [0.55 - 1.08] | 0.13    |
| Adequation                                         | 32 (44.4)          | 78 (49.7)        | 1.09         | [0.79 - 1.51] | 0.60    |

ICU: Intensive care unit; VAP: Ventilator-Associated Pneumonia; ECMO: Extracorporeal Membrane Oxygenation; PEEP: Positive-End-Expiratory pressure; Non-fermenting species: *Pseudomonas aeruginosa*, *Acinetobacter baumannii*, *Stenotrophomonas maltophilia*; MDR: Multi-drug Resistant; XDR: Extended-drug resistant.



**Supplement Table S6.** Main recent studies describing VAP in COVID-19 patients.

| Study                | Sample size | VAP incidence <sup>†</sup> | VAP complications                                   | Mortality <sup>‡</sup>        |
|----------------------|-------------|----------------------------|-----------------------------------------------------|-------------------------------|
| Rouzé et al          | 568         | 36 / NA                    | 23% MDR                                             | 29.2%                         |
| Garcia-Vidal et al   | 144         | 25 / NA                    | -                                                   | 9.8%                          |
| Pickens et al        | 179         | 44.4 / 45.2                | -                                                   | 19%                           |
| Gragueb-Chatti et al | 151         | 60 / 26                    | 37% recurrence,<br>68% with same pathogen           | 17% d-28,<br>26% d-60         |
| Luyt et al           | 50          | 86 / NA                    | 66% ≥ 1 recurrence,<br>38% polymicrobial            | 34%                           |
| Maes et al           | 81          | 48 / 28                    | -                                                   | 38%                           |
| Blonz et al          | 188         | 48.9 / 33.7                | 20% multiple VAP,<br>3.6% empyema<br>1.4% abscesses | 30.4% (VAP),<br>29% (overall) |
| Razazi et al         | 90          | 64 / NA                    | 25% recurrence (23% MDR)                            | 40%                           |
| Llitjos et al        | 176         | 52 / NA                    | 21% recurrence                                      | 31%                           |
| Moretti et al        | 39          | 54 / NA                    | -                                                   | 44%                           |
| Rouyer et al         | 79          | 53 / NA                    | 28% recurrences,<br>17% clinical success (d-7)      | 52%                           |
| Giacobbe et al       | 586         | 29 / NA                    | -                                                   | 46%                           |
| Contou et al         | 73          | 64 / NA                    | Among 73 death in ICU<br>23% recurrence (21% MDR)   | 48%                           |
| Grasselli et al      | 774         | 50 / 11.7                  | -                                                   | 26%                           |
| D'Humières et al     | 77          | 84.4 / NA                  | 57.4% failure at (d-7)                              | 51% (overall)                 |
| Beaucoté et al       | 161         | 73 / NA                    | 14% abscess, polymicrobial                          | 56%, (65% if<br>lung abscess) |

NA: not available; ECMO: Extra-Corporeal Membrane Oxygenation; MDR: Multi-drug Resistant.

<sup>†</sup> VAP crude incidence (%) and incidence density (expressed per 1000 mechanical ventilation days), whenever available.

<sup>‡</sup> Crude ICU-mortality (%), d-28 or d-60 or attributable mortality whenever available.
